1  
2  
3

## Morphological constraints on cerebellar granule cell combinatorial diversity

*Jesse I. Gilmer and Abigail L. Person*

*Department of Physiology & Biophysics*

*University of Colorado School of Medicine Aurora, CO 80045*

**Abstract: 237 words**

**Significance Statement: 119**

**Introduction: 616**

**Discussion: 1621 words**

**Figures: 6**

**Tables: 1**

**Keywords:** granule cells, granular, motor learning, combinatorics, combinatorial expansion, mixed selectivity, Purkinje, cerebellum, motor control, granule layer

### **Address for Correspondence:**

Abigail L. Person, Ph.D.  
Department of Physiology & Biophysics  
University of Colorado School of Medicine  
12800 East 19<sup>th</sup> Ave  
RC-1 North  
Campus Box 8307  
Aurora, CO 80045  
USA  
email: [abigail.person@ucdenver.edu](mailto:abigail.person@ucdenver.edu)  
(303) 724-4514

4  
5

## 6 **Abstract**

7 Combinatorial expansion by the cerebellar granule cell layer (GCL) is fundamental to theories of  
8 cerebellar contributions to motor control and learning. Granule cells sample approximately four mossy  
9 fiber inputs and are thought to form a combinatorial code useful for pattern separation and learning. We  
10 constructed a spatially realistic model of the cerebellar granule cell layer and examined how GCL  
11 architecture contributes to granule cell (GrC) combinatorial diversity. We found that GrC combinatorial  
12 diversity saturates quickly as mossy fiber input diversity increases, and that this saturation is in part a  
13 consequence of short dendrites, which limit access to diverse inputs and favor dense sampling of local  
14 inputs. This local sampling also produced GrCs that were combinatorially redundant, even when input  
15 diversity was extremely high. In addition, we found that mossy fibers clustering, which is a common  
16 anatomical pattern, also led to increased redundancy of GrC input combinations. We related this  
17 redundancy to hypothesized roles of temporal expansion of GrC information encoding in service of  
18 learned timing, and show that GCL architecture produces GrC populations that support both temporal  
19 and combinatorial expansion. Finally, we used novel anatomical measurements from mice of either sex  
20 to inform modeling of sparse and filopodia-bearing mossy fibers, finding that these circuit features  
21 uniquely contribute to enhancing GrC diversification and redundancy. Our results complement  
22 information theoretic studies of granule layer structure and provide insight into the contributions of  
23 granule layer anatomical features to afferent mixing.

## 24 **Significance Statement**

25 Cerebellar granule cells are among the simplest neurons, with tiny somata and on average just four  
26 dendrites. These characteristics, along with their dense organization, inspired influential theoretical  
27 work on the granule cell layer (GCL) as a combinatorial expander, where each granule cell represents a  
28 unique combination of inputs. Despite the centrality of these theories to cerebellar physiology, the  
29 degree of expansion supported by anatomically realistic patterns of inputs is unknown. Using modeling  
30 and anatomy, we show that realistic input patterns constrain combinatorial diversity by producing  
31 redundant combinations, which nevertheless could support temporal diversification of like-  
32 combinations, suitable for learned timing. Our study suggests a neural substrate for producing high  
33 levels of both combinatorial and temporal diversity in the GCL.

34

## 35 **Introduction**

36 Expansion recoding is a leading hypothesis for the role of the dense cerebellar granule cell layer (GCL)

37 (Marr, 1969; Albus, 1971). This network consists of vast numbers of small granule cells (GrCs) that  
38 possess on average just four dendrites (Eccles et al., 1967; Herculano-Houzel, 2010). Inputs to this  
39 layer are dominated by mossy fiber rosettes (MFRs), which are large presynaptic terminals that branch  
40 off of mossy fiber axons (MFs) and convey sensorimotor information from numerous structures into  
41 the cerebellum. MFRs form the core of synaptic glomeruli where they are contacted by numerous GrC  
42 dendrites, such that each GrC samples around 4 MFRs and sparsely represents convergent afferent  
43 input in higher dimensional space, which is thought to be critical for sensorimotor integration in service  
44 of motor learning (Fig. 1A; Marr, 1969; Albus, 1971; Blomfield and Marr, 1970). Many studies support  
45 these ideas, and similar anatomical organization has been observed in brain areas as diverse as electric  
46 fish electrosensory lateral line lobe, fruit fly mushroom bodies, mammalian olfactory cortex and dorsal  
47 cochlear nucleus, suggesting a conserved computational function (Kennedy et al., 2014; Sawtell, 2010;  
48 Caron et al., 2013).

49  
50 A central tenet of the recoding hypothesis is that GrC activity is very sparse, owing to the extensive  
51 combinatorial diversity of GrC inputs, where the likelihood of two GrCs sharing the same combination  
52 of MFR inputs is low. Yet recent studies using  $Ca^{2+}$  imaging to monitor GrC population activity have  
53 called into question the sparseness of GrC activity. These studies have noted higher densities of active  
54 GrCs than predicted by classic theory (Giovannuci et al., 2017; Wagner et al., 2017; Knogler et al.,  
55 2017). How dense activation of GrCs would be supported by highly diverse combinations of inputs  
56 onto GrCs is unclear. Furthermore, these dense activity patterns would seem to suggest degradation of  
57 the high dimensionality produced by sparse GrC activity, raising the question of the computational  
58 utility of redundant GrCs.

59  
60 While Marr's original study assumed relatively uniform access of GrCs to mossy fiber afferents,  
61 precerebellar sources encoding diverse signals often ramify in dense patches, suggesting non-uniform  
62 mixing of inputs. Such anatomical features have contributed to refinement of cerebellar cortical theory  
63 (D'Angelo, 2017; Billings et al., 2014). For instance, spatial correlations of MFR inputs can enhance  
64 information transmission in models of the GCL (Billings et al., 2014). Furthermore, studies of delay  
65 eyelid conditioning reveal that well-timed learning occurs even with dense electrical activation of MFs  
66 (Steinmetz et al., 1986; Freeman and Rabinak, 2004, Halverson, 2009). These observations have led to  
67 theories proposing temporal expansion of GrC population activity, where GrCs receiving similar inputs  
68 nevertheless sparsely fire throughout the conditioning window (Medina et al., 2000; Mauk and

69 Donegan, 1997).

70

71 We propose that dense GrC activity patterns could be explained by mossy fiber ramification patterns,  
72 and that this density could support temporal expansion processes in the GCL. We used an anatomically  
73 realistic model to test the hypothesis that dense ramification patterns of MFRs would produce  
74 redundant MFR combinations on GrCs, potentially contributing to denser activations than originally  
75 proposed. We also examined how other morphological and organizational features of the GCL –  
76 namely MF diversity, GrC dendrite length, and a morphological specialization of MFRs composed of  
77 long, thin synaptic extensions that contact GrCs, called filopodia – contribute to and constrain GrC  
78 combinatorial diversity. Anatomical details in the model were validated in empirical observations of the  
79 nucleocortical and pontine MF systems, described here. Together, our findings illuminate both the  
80 capacity of the layer to confer mixed selectivity to GrCs in service of pattern separation (Rigotti et al.,  
81 2013; Litwin-Kumar et al., 2017), and the level of redundancy (i.e. the number of identical MFR  
82 combinations) likely to emerge within the layer in support of temporal expansion encoding.

83

## 84 **Materials and Methods**

85 The goal of this study was to address how anatomical features of the cerebellar granule cell layer  
86 (GCL) influence granule cell (GrC) combinatorial diversity, i.e. the uniqueness of mossy fiber rosette  
87 (MFR) combinations made by GrCs. To address these questions, we combined anatomical observations  
88 with a model that mimics the geometric organization of the GCL. We varied model parameters to test  
89 the role of specific anatomical features to GrC combinatorial diversity. Anatomical and modeling  
90 methods are described below.

91

## 92 **Anatomy**

### 93 *Subjects*

94 Adult C57/B6 mice (Charles River; n = 9 mice) of either sex were used in accordance with the National  
95 Institutes of Health Guidelines and the Institutional Animal Care and Use Committee at the University  
96 of Colorado Anschutz Medical Campus. Animals were housed in an environmentally controlled room,  
97 kept on a 12:12 light/dark cycle and had ad libitum access to food and water. A total of 9 mice were  
98 used in the entire study.

99

### 100 *Virus Injections*

101 For all surgical procedures mice were anesthetized with intraperitoneal (IP) injections of a ketamine  
102 hydrochloride (100 mg/kg) and xylazine (10 mg/kg) cocktail, placed in a stereotaxic apparatus and  
103 prepared for surgery with a scalp incision. Craniotomies were made above the cerebellar nuclei (CbN;  
104 1 injection from lambda: 2.0 mm posterior, 1.0 mm lateral, 2.5 ventral; n=9/9 mice); and the basilar  
105 pontine nuclei (from bregma) 4.0-4.5 mm posterior, 0.4 mm lateral, and 5.5 mm ventral (n = 4/9 mice).  
106 Pressure injections of 0.15-0.25  $\mu$ L AAV1.hSyn1.mCherry (University of North Carolina Vector Core)  
107 and AAV1.hSyn1.eYFP (UNC) were made using a 1  $\mu$ L Hamilton Neuros syringe attached to the  
108 stereotaxic apparatus (Stoelting). Virus use was approved by and in accordance with the University of  
109 Colorado Anschutz Institutional Biosafety Committee. All surgeries included postoperative analgesia  
110 with IP injections of carprofen (5 mg/kg) once per 24 hr for 48 hr. Mice were housed postoperatively  
111 for 3-6 weeks before perfusion to allow for viral expression throughout the entirety of the axonal arbor.  
112

### 113 *Tissue Preparation for Light Microscopy*

114 Mice were deeply anesthetized with an IP injection of sodium pentobarbital (Fatal Plus; Vortech  
115 Pharmaceuticals), and perfused transcardially with 0.9% saline followed by 4% paraformaldehyde in  
116 0.1 M phosphate buffer (PB). Brains were removed and postfixed for at least 24 hours then  
117 cryoprotected in 30% sucrose. Brains were sliced in 40  $\mu$ m serial coronal sections using a freezing  
118 microtome, stored in PB, and coverslipped in Fluoromount-G (SouthernBiotech) mounting medium.  
119

### 120 *Anatomical Measurements*

121 A total of 1658 MFRs in 9 mice were analyzed, spanning cerebellar lobules including Crus I, Crus II,  
122 Paramedian, Simple, and vermal lobules 3, 4, 5, and 6. MFRs were labeled from cerebellar nuclear  
123 and/or pontine injections. Rosettes were imaged on a Marianas spinning disc confocal microscope with  
124 a 63x objective. To quantify nearest neighbors, montages of Lobules 6 and Crus 1 were produced from  
125 high resolution images, and the location of each MFR was mapped (n = 874 boutons; n = 4 dual  
126 injected mice, Lobules 6 and Crus 1). We noted the presence or absence of filopodia on these MFRs  
127 and an additional 784 MFRs from 5 additional mice located throughout the cerebellum for a total of  
128 1658 MFRs. Euclidean distance from each rosette to its 4 nearest neighbors was then computed and  
129 analyzed in MATLAB (RRID:SCR\_001622). To quantify the number and distance of the filopodia  
130 from the MFR, 84 rosettes were analyzed, with 70 fully reconstructed in 3D using NeuroLucida 360  
131 software (RRID:SCR\_001775) (Fig. 6). Filopodial boutons were defined as swellings at least 1  $\mu$ m  
132 wide on processes that extended from the main rosette but did not leave the section (Gao et al., 2016).

133

134 *Experimental Design and Statistical Analyses*

135 Anatomical observations were made in 4-9 mice. Nearest neighbor measurements were made with  
136 custom scripts in MATLAB and compute the Euclidean distances of the 4 nearest neighbors of each  
137 MFR in 2 dimensions in the coronal plane. Summary data of nearest neighbors are visualized in  
138 cumulative distribution functions and populations compared with the two sample Kolmogorov-Smirnov  
139 test in Matlab, with p-values and n's reported in the text. Simulations were validated by performing  
140 multiple instantiations of modeled systems described in each section below.

141

142 **Modeling**

143 *Model-free calculations*

144 Theoretical numbers of MFR combinations given the number of synapses per GrC, were computed  
145 using n choose k with replacement, where n is the number of MFRs and k is the number of inputs per  
146 GrC (Fig. 1).

147

148 *Simulations*

149 We modeled groups of mossy fibers and granule cells in MATLAB with density and spatial  
150 relationships based on anatomical and physiological data (Palkovits, et al., 1971; Sultan et al, 2001;  
151 Solinas et al., 2010). Specifically, the model incorporated physiological density and distribution of  
152 GrCs and MFRs, the length of GrC dendrites, and the divergence and convergence of MFRs onto GrCs  
153 (Table 1).

154

155 MFRs and GrCs were programmed to represent their 3D position in space and associated radii. Model  
156 systems were generated by first populating a defined space with MFRs. System dimensions were  
157 100x100x250  $\mu\text{m}$ , and contained 3458 GrCs and 247 MFRs, except where noted. Each MFR was  
158 checked against every other existing MFR to ensure spatial non-overlap, rejecting a placement if the  
159 distance between the centers was less than the sum of the radii. MFR tiling obeyed a flexible spacing  
160 constraint such that each MFR had three neighbors with a mean distance of 18.4 microns between them  
161 from center to center, consistent with anatomical measurements of glomerular spacing (Palkovits, et al.,  
162 1971). To do this, we chose randomly from existing MFRs and placed a new rosette at 16.4-20.4  $\mu\text{m}$   
163 intervals. Perfectly even spacing of MFRs generated tetrahedrons, which do not tile in 3D space, so up  
164 to 2 microns of jitter about the mean spacing allowed for generation of nearly evenly spaced MFRs.

165 MFR tiling approximated a tetrahedral matrix.

166

167 GrC placement followed a series of steps. First, seed locations were selected from either existing MFRs  
168 or GrCs, then a new GrC was placed a random distance away, excluding locations overlapping within  
169 the sum of the radii of existing elements. Second, GrCs made four random synaptic connections with  
170 nearby MFRs, limited to distances less than or equal to the sum of the dendrite length and MFR radii  
171 (28  $\mu\text{m}$ , unless where noted). If the random location was not within reach of 4 MFRs it was discarded.  
172 Third, GrCs synapsed preferentially onto MFRs that had fewer than 56 synapses with other GrCs, but  
173 MFR connectivity was capped at 80 GrCs. Overall, there was a range of 53-77 GrC synaptic  
174 connections per MFR, with a mean of 56 (SEM = 0.82, n=151 systems). The final result was a modeled  
175 population with closely packed elements resembling the dense packing of GrCs within the GCL (Fig.  
176 2A).

177

178 *MFR diversity and spatial distribution modeling*

179 One goal of the present study was to understand how MFR diversity influences GrC combinatorial  
180 diversity. Because we were interested in identifying specific combinations of MFRs onto GrCs, we  
181 assigned an identity “ID” to each MFR. The ID terminology is a proxy for the source and/or uniqueness  
182 of the MFR, such that we can think of modeled MFRs as originating from different cells or different  
183 nuclei if they do not share an ID number. Throughout the text we refer to MFRs as a general term that  
184 assumes each MFR has an ID, such that groups of MFRs imply the specific combination of ID numbers  
185 of MFRs converging on a GrC.

186

187 To examine the relationship between MFR diversity and GrC combinatorial diversity, we varied the  
188 number of different ID numbers assigned to a fixed number of MFRs. We refer to the number of  
189 different ID numbers in a system as  $n$ . In low diversity systems, many MFRs had the same ID number,  
190 whereas in high diversity systems, few to no MFRs shared an ID. We analyzed the combinations of  
191 MFR ID numbers formed by GrCs within the simulation, tracking the number of shared ID number  
192 combinations between different GrCs. The combinatorial diversity of GrCs refers to the number of  
193 different MFR combinations produced by the population of GrCs within the simulation. In some  
194 analyses, groups of MFRs converging on a GrC were subdivided into the quartet, (the combination of 4  
195 MFRs), triplets (any 3 of the 4 convergent MFRs), etc., noting that these MFR combination sizes are  
196 equivalent to the “codon” terminology used in Marr, 1969. We also investigated the relative change in

197 GrC combinatorial diversity produced by adding one additional ID number to the MFRs in the system,  
198 defined as,

199

$$200 \quad \textit{Marginal addition to diversity} = \textit{unique GrCs} * \frac{\textit{total MFRs}}{n} \quad (\text{Equation 1})$$

201

202 where unique GrCs refers to the number of unique MFR ID number combinations produced by the  
203 system GrCs, total MFRs is the number of MFRs in the system, and  $n$  is the number of ID numbers  
204 assigned to the MFRs.

205

206 Another feature of mossy fiber patterning that we simulated was clustering of similar MFRs. To  
207 examine the effect of MFR clustering on the diversity of MFR combinations produced by GrCs, we  
208 populated the simulation with MFRs assigned ID numbers drawn from a Gaussian-like probability  
209 distribution generated using the randn function in MATLAB. In effect, this method led to non-uniform  
210 representation of specific ID numbers within the system, with many MFRs assigned highly probable ID  
211 numbers, mimicking clustering. These systems were compared to non-clustered models, in which ID  
212 numbers were selected from a flat ID probability distribution, producing a space in which each ID  
213 number was equally likely. These systems were analyzed for diversity, redundancy and fraction of  
214 theoretically possible combinations produced, with analyses repeated in 100 trials across 100 systems  
215 (120 x 120 x 100  $\mu\text{m}$  in size, containing 142 MFRs and 1,988 GrCs). Redundancy of a particular  
216 combination of MFRs on modeled GrCs was defined as the number of GrCs in that system possessing  
217 identical combinations of MFRs (i.e, the same quartet). The system redundancy was the mean number  
218 of repeats of MFR combinations formed by GrCs in that system. Diversity was defined as the total  
219 number of unique combinations of MFR inputs of a given size in the GrC population. We refer to  
220 redundancy changes as a function of MFR diversity as  $\textit{redundancy}(n)$  where  $n$  is the number of  
221 different ID numbers.

222

223 A related spatial pattern of MFR termination that we modeled was sparsity. Here, a random MFR was  
224 chosen from a standard model and was given a new, unique ID number. This analysis was repeated  
225 across a range of ID diversity levels in 150 different system instantiations with 5 trials each. To analyze  
226 the diversity and redundancy of MFR combinations with sparse fibers included, three different types of  
227 systems were compared. First, systems with ' $n$ ' inputs, called "baseline" systems, where ' $n$ ' is the  
228 number of different ID numbers; Second, systems with ' $n$ ' inputs, in which a single rosette is changed



229 to a unique input, called “sparse” systems; Third, systems with ‘ $n+1$ ’ inputs distributed uniformly,  
230 termed “expanded” systems. The expanded system was essential to the comparisons because it allowed  
231 us to determine if the effect of sparseness on GrC combinatorial diversity was solely a consequence of  
232 adding an additional input. Using these systems, we first calculated differences in diversity and  
233 redundancy in the sparse and expanded systems relative to baseline. We then compared changes in  
234 diversity and redundancy between these conditions, expressed as a percent difference in the effect of  
235 the sparse or uniformly expanded inputs, defined by:

236

$$237 \quad \text{Sparse performance} = \frac{\text{redundancy('sparse')}}{\text{redundancy('expanded')}} \times 100 \quad (\text{Equation 2})$$

238

239

240 The diversity measurements were identical, substituting redundancy for diversity.

241

242 We postulated that dense afferents serve a computational purpose that could be disrupted by adding  
243 another uniformly distributed input. We therefore asked whether a sparse input, when added to a pre-  
244 existing system, preserves GrC combinatorial patterns differently than adding another uniform input.  
245 We analyzed the retention of existing GrC combinations in the baseline system upon addition of a  
246 “sparse” or “expanded” input type by computing a retention index: First, each MFR quartet in the  
247 baseline system was given a value of 1, with redundant MFR combinations summed, such that the  
248 value reflected the number of repeats of a given combination. Next, each combination in the ‘sparse’ or  
249 ‘expanded’ systems was scored similarly. Finally, each combination in the baseline system was then  
250 compared to each combination in the new system, receiving a retention score given by baseline value  
251 divided by new system value. If a combination was lost in the new system, it was scored as a 0. The  
252 mean score for all combinations was computed for comparisons between baseline and ‘sparse’ and  
253 baseline and ‘expanded’. Finally, to compare how different types of systems retained combinations we  
254 computed a metric that took the ratio of retention scores between the systems, defined as:

255

$$256 \quad \text{Percent Combinations Retained} = \frac{\langle \text{retention 'sparse'} \rangle}{\langle \text{retention 'expanded'} \rangle} * 100 \quad (\text{Equation 3})$$

257

### 258 *Dimensionality Calculations*

259 The GCL is hypothesized to act as a combinatorial expander, increasing the dimensionality of inputs (Marr,  
260 1969; Albus, 1971). Because dimensionality is a function of the independence of neuronal activity,

261 coincident neural activity produced by redundant MFR combinations would be expected to reduce  
262 dimensionality. Therefore, to explore the dimensionality of systems as a function of MFR diversity, we  
263 generated 150 different systems of GrCs and MFRs as described above. Within each system, we simulated a  
264 range of MFR diversity levels where between 1-100 different MFR ID numbers were assigned to the MFR  
265 population. We established a proxy for neuronal activity where GrCs were considered active when three of  
266 their four MFRs were synchronously active (Billings et al., 2014; Jörntell and Ekerot, 2006). The MFR  
267 activity level was set such that on average 10% of MFRs in the simulation were active at a given time  
268 (Litwin-Kumar et al., 2017), over 1000 epochs. The activity of a given MFR ID number was determined by  
269 assigning it a value from a random number generator every epoch. When the random number exceeded a  
270 pre-determined threshold, the ID number was 'active'. Note that in low diversity systems, many MFRs  
271 share the same ID number, rendering many MFRs coincidentally active. The threshold for determining an  
272 active ID number from the random number generator was therefore varied to ensure that even in low  
273 diversity systems, with many MFRs possessing the same ID, the mean total active population was  
274 maintained at 10%. 1000 epochs were generated in each simulation and all pairwise GrC correlations and  
275 variance of correlations were measured over the all epochs. 5 trials of each simulation were performed and  
276 the average correlation and variance measured and used in Equation 4 (below). In total, 500,000 epochs for  
277 each diversity level were analyzed.

278

279 To assay the dimensionality produced by combinatorial expansion (CE) of the model GCL as a function  
280 of diversity level,  $n$ , we used the equation,

281

$$282 \quad CE(n) = \frac{1}{\frac{1}{M} + \langle \text{corr}(GrC_i, GrC_j) \rangle^2 + \langle \text{var}(\text{corr}(GrC_i, GrC_j)) \rangle} \quad (\text{Equation 4})$$

283

284 where  $n$  is number of unique MFR ID numbers in the model,  $M$  is the number of granule cells,  
285  $\langle \text{corr}(GrC_i, GrC_j) \rangle^2$  is the squared mean correlation coefficient of the activities of  $GrC_i$  and  $GrC_j$  over  
286 all pairwise GrC comparisons,  $i$  and  $j$ , across all epochs, and  $\langle \text{var}(GrC_i, GrC_j) \rangle$  is the mean variance of  
287 all pairwise correlations across all epochs as described in Litwin-Kumar et al., 2017. This calculation  
288 was repeated for each system and averaged for each value of  $n$ .

289

290 A prominent hypothesis in cerebellar literature proposes that GrCs receiving correlated inputs become  
291 temporally diversified (i.e. fire at different times despite receiving the same input), leading to increased  
292 dimensionality supporting learned timing (Fig. 3A,C; Mauk and Donegan, 1997; Medina et al., 2000),

293 which is not captured in Equation 4. Behavioral measurements of intervals over which an animal can  
294 learn a conditioned response suggest that information can be diversified up to 500 ms, with  
295 physiological measurements showing individual GrCs bursting for approximately 20 ms  
296 (Schneiderman and Gormezano, 1964; Smith et al., 1969; Yeo and Hesslow, 1998; Ishikawa et al.,  
297 2015). At the limit, every GrC could be decorrelated from every other GrC, producing maximal  
298 dimensionality even if each GrC received identical inputs. However, based on GrC burst times, this  
299 would predict unrealistically long temporal expansion windows. We therefore used physiological  
300 estimates of temporal learning windows to constrain a metric for temporal expandability (TE) where  
301 we penalized over- or under-representation of dimensions produced by CE, for a given time window.  
302 We defined ‘over-representation’ ( $R_o$ ) and under-representation ( $R_u$ ) as:

303

$$304 \quad R_o(n) = M - \frac{t_{respmax}}{GrC_{response}} * CE(n) \quad (\text{Equation 5})$$

$$305 \quad R_u(n) = \left( \frac{t_{respmax}}{GrC_{response}} - \frac{M}{CE(n)} \right) * \left( M * \frac{GrC_{response}}{t_{respmax}} \right) \quad (\text{Equation 6})$$

306

307 where  $n$  is the number of different MFR ID numbers,  $M$  is the number of GrCs and  $CE(n)$  is the  
308 dimensionality of the system computed using Eq. 4 . The  $R_o$  formula returns the number of “extra”  
309 GrCs over all dimensions that are unnecessary for complete temporal expansion over the  $t_{respmax}$   
310 interval (500 ms), assuming a given  $GrC_{response}$  burst duration (20 ms). The  $R_u$  formula returns the  
311 difference between the number of GrCs that would be needed to completely represent the time window  
312 and the number of GrCs per dimension, scaled by the optimal number of GrCs needed per dimension to  
313 represent the time interval. When either  $R_o$  or  $R_u$  returned a negative value, we set the metric to 0.

314

315 We then used these penalties to compute a function that captures both the temporal and combinatorial  
316 expansion (TECE):

317

$$318 \quad TECE(n) = M - R_o(n) - R_u(n) \quad (\text{Equation 7})$$

319

320 Where  $M$  is the number of GrCs (and maximum dimensionality), from which the lost dimensionality  
321 which occurs due to the  $R_o$  and  $R_u$  terms are subtracted.

322

323 Finally, we tested differences in the  $TECE(n)$  calculated for models in which spatial relationships were

324 included ('physiological') and models in which there were no spatial constraints considered ('non-  
325 spatial'). The non-spatial model used here was simulated by assigning 4 MFR IDs at random to each  
326 GrC in a model system of the same size as the 'physiological system', irrespective of space.

327

### 328 *Filopodia Modeling*

329 Statistics of MFR filopodia gathered from the anatomical experiments were used in the spatial GCL  
330 model to mimic filopodia. We simulated filopodia by adding between 1-5 (median, 2) synaptic  
331 connections with GrCs within 22 microns of the MFR. We added simulated filopodia to between 8 -  
332 20% of MFRs. This was simulated in 450 different systems, with 5 trials each.

333

## 334 **Results**

### 335 **Theoretical limits on combinatorics imposed by granule cell-to-mossy fiber ratios**

336 Expansion recoding is a leading hypothesis for the role of the dense cerebellar granule layer network  
337 formed with mossy fiber rosettes (MFRs). First proposed by Marr and elaborated by Albus (Marr,  
338 1969; Albus, 1971), the idea that granule cells (GrCs) sample around 4 MFRs and represent convergent  
339 afferent input in higher dimensional space is central to ideas of cerebellar sensorimotor integration  
340 (Fig. 1A). Before analyzing how GCL organizational features influence the number of different  
341 combinations of MFRs represented by the GrCs, i.e. combinatorial diversity, we made a series of  
342 simple calculations defining the maximum number of MFR permutations possible, given MFR  
343 diversity. These calculations highlight the fact that complete permutation of cerebellar inputs is not  
344 physiologically realistic and motivate the spatially-constrained modeling. The theoretical number of  
345 permutations of MFRs can be computed using the binomial coefficient,  $n$  choose  $k$ , with replacement,  
346 where  $n$  is the number of unique MFRs and  $k$  is the number of inputs per GrC. We compared these  
347 values to the number of GrCs that exist per MFR (14:1), based on numerical ratios derived from  
348 anatomical estimates (Jakob and Hamori, 1988). The rapid increase in the binomial coefficient as a  
349 function of MFR numbers quickly exceeds the number of GrCs that exist (Fig. 1B-C) such that when  
350 there are more than 5-6 MFRs in a system of 84 GrCs, some MFR quartets go unrepresented in the GrC  
351 population (Fig. 1B). Even when considering divergence, where each MF forms between 20-200 MFRs  
352 (Wu et al., 1999; Shinoda et al., 1992; McCrea et al., 1977; Quy et al., 2011), theoretical complete  
353 mixing is limited to between 18 and 31 unique sources in the GrC population of approximately 6,000-  
354 46,000, depending on the level of divergence (Fig. 1C, intersection of shaded regions and black curve).  
355 These calculations indicate that the cat granule layer, containing 2-4 billion granule cells and 77 million

356 MFRs (Palkovitz et al., 1971), could fully permute just 470-560 unique MFR sources, depending on the  
357 level of MF divergence. Therefore, the cerebellum would not represent all quartets unless each input is  
358 duplicated between 2,700- 4,600 times, a highly unlikely scenario (Fig. 1D, blue shading).

359

### 360 **Spatial constraints on granule layer combinatorics**

361 The previous calculations do not take into account any spatial features of GCL organization, which  
362 would be expected to influence the diversity of convergence of MFRs onto GrCs. As an extreme  
363 example, two MFs that terminate in different lobules would obviously not converge on a common GrC.  
364 We speculated that the morphological features of the GCL might extend these spatial restrictions at  
365 local levels, where combinations of MFs ramifying even in a relatively local area might not be  
366 combined if GrC dendrites are too short to reach them (schematized in Fig. 2B). We therefore  
367 examined how the anatomy of the GCL influences the performance of the layer as a combinatorial  
368 expander. To address this, we developed a model that mimics the geometric organization of the GCL  
369 and manipulated spatial features to determine the role of specific anatomical features to GrC  
370 combinatorial diversity (Fig. 2A; See Modeling in Materials and Methods).

371

372 We first investigated the role of GrC dendrite length on access to local MFRs. We measured the effect  
373 of GrC dendrite length on the access to diverse MFRs in modeled systems with varying MFR diversity.  
374 We found that dendrite lengths falling within a physiological range (8-20  $\mu\text{m}$ ; shaded region) strongly  
375 limit access to MFRs. As the MFR diversity increases, GrCs cannot access that diversity because of the  
376 shortness of their dendrites (Fig. 2C). Therefore, locally, the number of MFRs accessible to granule  
377 cells is capped at fewer than 10, regardless of MFR heterogeneity. As expected, lengthening dendrites  
378 permitted granule cells to access a greater diversity of MFRs. Increasing the dendrite length from 20 to  
379 60 microns allows a GrC to access 5-10-fold more unique MFRs, depending on the diversity of the  
380 local MF population (Fig. 2C).

381

382 We next computed the number of unique combinations of 4 MFRs produced by a modeled population  
383 of ~3500 granule cells and ~240 MFRs, taking into account spatial relationships of GrCs and MFRs.  
384 We assigned ID numbers to MFRs in the model and varied the diversity of the population of MFRs  
385 from being entirely homogeneous (where each MFR has the same ID) to entirely heterogeneous (where  
386 each MFR has a unique ID; Fig. 2D). Focusing here first on quartets (combinations of 4 inputs), the  
387 relationship between MFR diversity and number of different combinations formed on GrCs showed

388 two striking features. First, GrCs are quickly saturated with unique MFR combinations as MFR  
389 diversity increases, illustrated by the asymptote in the number of unique granule cell combinations  
390 (Fig. 2D, red curve). This cap on unique MFR combinations suggests that with just moderate MFR  
391 diversity, most GrC input combinations are unique. As the MFR population continues to diversify, new  
392 unique MFR combinations replace other unique MFR combinations, illustrating the effectiveness of the  
393 GCL as a combinatorial expander. The apparent cap on diversification of quartets at approximately 30  
394 MFR IDs in this system indicates that quartets quickly approach the combinatorial limit imposed by  
395 GrC population sizes.

396

397 A second feature of GrC combinatorial diversity as a function of MFR diversity was that GrC  
398 combinatorial diversity is never maximal, asymptoting near 80% of GrCs bearing unique MFR  
399 combinations. That is, the number of unique combinations remains below the number of GrCs in the  
400 system, even when the MFR population is completely diverse. This phenomenon reflects local  
401 resampling of MFRs, and indicates that multiple representations of specific combinations, while not  
402 dominant in the population, is a byproduct of short dendrites and glomerular presynaptic structures.

403

404 We next examined how the number of GrCs with different MFR combinations changes if we  
405 considered just a subset of the combination of 4 convergent MFRs (3, 2, or 1 MFR), since a subset of  
406 MFR afferents could produce redundant GrC activity (Billings et al., 2014; Jörntell and Ekerot, 2006).  
407 We found that as the diversity of MFRs increases, the number of combinations of 3 MFRs produced by  
408 GrCs continues to increase beyond the point where quartets are saturated (Fig. 2D, green curve).

409

410 Regardless of combination size, we noticed a roll-off in the number of unique MFR combinations  
411 produced as the system diversifies. We explicitly computed the relationship between GrC combinatorial  
412 diversity and the addition of each new MFR, plotted in Fig. 2E, by weighing each additional GrC-MFR  
413 combination against the ratio of total MFRs to unique MFRs (Eq. 1). The peaks in these curves indicate  
414 the point at which each additional MFR ID adds relatively less to overall GrC combinatorial diversity.

415

416 These analyses assume equal strength of MFR inputs to GrCs and spiking thresholds requiring  
417 coincident activity of either quartets, triplets or doublets. Interestingly, long-term potentiation (LTP) at  
418 the MFR->GrC synapse has been observed, which might be predicted to change the effective subset of  
419 convergent MFRs onto a granule cell. To test this idea, we established a thresholding rule on a granule

420 cell, but then increased the contribution of each MFR, simulating LTP at this synapse (Mapelli and  
421 D'Angelo, 2007). When inputs were allowed to strengthen, we found an increase in the number of  
422 combinations that could drive this population of GrCs (Fig. 2F). This diversity in driving inputs might  
423 be exploited by an adaptive filter via the Golgi cell (Billings et al., 2014). Furthermore, it would be  
424 predicted to produce denser recruitment of granule cells than in an unpotentiated state (Diwakar et al.,  
425 2011).

426

### 427 **Spatial constraints enhance the capacity for temporal diversification of granule cells**

428 These data show that the spatial organization of the granule layer limits the number of MFR  
429 permutations possible and produces redundant MFR combinations. The presence of redundant  
430 combinations of MFRs on GrCs in the spatially constrained model raised the question of whether there  
431 may be utility to redundancy that is not well captured by dimensionality produced by combinatorial  
432 expansion (CE). Theories of the expansion of specific information in the temporal domain (Mauk and  
433 Donegan, 1997; Medina et al., 2000) could explain the utility of redundant combinations, since  
434 identical information sources could activate GrCs, which could be further diversified in time, in support  
435 of learned timing. For instance, if many GrCs share a dimension produced by combinatorial identity  
436 (Fig. 3A, “Low ID system” indicated by color), that dimension could be temporally expanded (TE).  
437 Alternatively, if GrCs are already extremely combinatorially diverse, and few GrCs are shared per  
438 dimension, the combinatorially defined dimension cannot be temporally expanded as extensively (Fig.  
439 3A, bottom).

440

441 These features would predict reduced dimensionality of information represented by the system. We  
442 used a simplified model of GrC activity based on MFR activity and analyzed dimensionally as a  
443 function of MFR diversity (See Materials and Methods, Eq. 4). We calculated the dimensionality of the  
444 system with and without spatial constraints and found that, consistent with recent findings, the  
445 anatomically constrained “physiological” system showed a decrease in dimensionality relative to a non-  
446 spatial, randomly connected network (Fig. 3B; Litwin-Kumar et al., 2017). We therefore considered  
447 the idea that GrCs with redundant combinations of MFRs could fire at different times, owing to either  
448 GCL circuitry or synaptic diversity (Medina et al., 2000; Chabrol et al., 2015). This scenario would  
449 both recover dimensionality lost by redundancy and support specific information being represented  
450 over extended time windows. Based on the temporal dynamics of GrCs and the limit of learned timing  
451 in delay eyelid conditioning, we modeled GrC activity such that each GrC was active for a 20 ms epoch

452 (GrC<sub>response</sub>) over a 500 ms window ( $t_{\text{respmax}}$ ) (Ishikawa, et al. 2015, Schneiderman and Gormezano,  
453 1964; Smith et al., 1969; Yeo and Hesslow, 1998 ). We assumed a cost to over- and under-representing  
454 a given combination over time (Eq. 5-6, Methods) and measured the dimensionality of the time  
455 expanded simulation (TECE) over a range of MFR diversity levels (Eq. 7). Fig. 3C shows the results of  
456 this simulation and analysis when added to the calculation of dimensionality produced by  
457 combinatorial expansion. Intuitively, the more redundant the combinations, the greater the capacity of  
458 the specific combinations to diversify over time. This intuition is supported by a peak in the temporal  
459 expansion (TECE) curve at low diversity levels, which then dropped off with increasing MFR diversity.  
460 As the diversity of inputs increases, the layer falls short of providing enough GrCs to expand this  
461 information in time.

462  
463 Importantly, the model with physiological spatial constraints showed improved performance over the  
464 non-spatial connectivity model, achieving both high dimensionality and temporal expandability (Fig.  
465 3C). The peaks of these curves occur when the number of GrCs per dimension is equal to the minimal  
466 number of GrCs required to completely fill the time interval (See methods) and is therefore dependent  
467 on the temporal assumptions (GrC<sub>response</sub> and  $t_{\text{respmax}}$ ; Eq. 5-6). The physiological model has higher  
468 TECE than the non-spatial model with temporal expansion windows greater than 200 ms, within the  
469 range which rabbits readily learn conditioned stimuli (Schneiderman and Gormezano, 1964). At shorter  
470  $t_{\text{respmax}}$  (i.e. < 200 ms), the non-spatial model has higher TECE. These calculations suggest that the  
471 granule layer may balance requirements to expand information temporally as well as diversify inputs as  
472 a result of combinatorial expansion.

473

#### 474 **Impact of mossy fiber heterogeneity on spatial organization of GrCs sharing inputs**

475 Receptive fields of GrCs tend to be somatotopically patchy, suggesting redundant mossy fiber input to  
476 GrCs (Welker et a 1984; Jörntell and Ekerot, 2006; Voogd and Glickstein, 1998). Because MFRs are  
477 sampled by many neighboring GrCs, local sharing of a given MFR is expected, and we therefore  
478 examined the spacing of GrCs that share a given number of MFRs in our model. We measured the  
479 spatial relationship between GrCs that shared one or more common inputs (i.e. inputs had common  
480 MFR ID numbers). As MFR diversity increased, the distance between GrCs sharing inputs diminished  
481 rapidly (Figs. 4A, B). We analyzed this phenomenon by measuring the Euclidian distance between all  
482 GrCs and classified them into groups determined by the similarity of their combinations. For example,  
483 with only five MFR ID numbers assigned to the MFR population, the spatial distribution of GrCs that



484 share four specific MFR inputs or share no inputs are equally spaced, illustrated in a cumulative  
485 distribution of the distances between GrCs sharing inputs (Fig. 4A). By contrast, when the MFR  
486 population is diversified to the point that it is approximately 25% diverse (1 in 4 MFRs shares an ID),  
487 GrCs that share the same 4 input ID numbers cluster within approximately 20 microns of one another  
488 and GrCs that share no inputs remain homogeneously spaced within the volume (Fig. 4B, C). This can  
489 be seen comparing the red and black curves in Fig. 4B, which plots distances of GrCs that share all or  
490 no inputs, respectively. These analyses were extended for modeled systems in which we varied MFR  
491 diversity systematically, ranging from all identical to all dissimilar. Distances between GrCs with  
492 shared input combinations drop with increased MFR diversity (Fig. 4C).

493  
494 While redundant quartets become highly restricted in space, GrCs that share 3, 2 or 1 MFR ID can  
495 remain fairly distant from one another, as shown in Figs. 4B,C (green and blue curves). We visualized  
496 the space of shared MFR IDs in a modeled system with 20 MFR ID numbers (Fig. 4D). GrCs are  
497 plotted as gray points, and colored boxes surround GrCs that share MFR ID numbers. The volume  
498 occupied by GrCs with identical quartets (red box) is extremely circumscribed. The volume of the  
499 bounding box for identical quartets drops rapidly as MFR diversity increases (Fig. 4E, red curve),  
500 asymptoting around  $36 \mu\text{m}^3$ , the volume occupied by the reach of a single mossy fiber. Similarly,  
501 bounding volumes of GrCs sharing MFR triplets or doublets also decrease as diversity increases (Fig.  
502 4E, green and blue curves), implying that although specific GrC MFR quartet combinations saturate  
503 quickly, the number of shared MFRs in the population continues to drop as MFR diversity increases,  
504 reducing the space over which GrCs share MFRs.

505  
506 In summary, by increasing diversity of mossy fibers, patchy representations emerge because of the  
507 spatial restrictions of the GrC dendrites and MFRs. Grouping also occurs as a consequence of MFR  
508 combination probabilities dropping off sharply in space, although subsets of inputs are shared by more  
509 widely spaced GrCs. This phenomenon suggests that local inhibition could regulate the size of the  
510 MFR combination relayed to Purkinje neurons, without sacrificing the subsets of the combinations  
511 completely, as would occur with maximal local diversity.

### 512 513 **Impact of mossy fiber spacing on combinatorial diversity**

514 Mossy fiber afferents frequently appear to terminate within clusters in the GCL. For example, both the  
515 nucleocortical pathway and the basilar pontine nuclei terminate in patches of cortex (Fig. 5A-C; Houck

516 and Person, 2015; c.f. Huang et al., 2013). Such clustering is common, with MFs from diverse sources  
517 terminating densely along zebrin stripes, or in similarly spaced stripes within the layer (Sillitoe et al.,  
518 2010; Gebre et al., 2012; Quy et al., 2011; Gao et al., 2016; Valera et al., 2016). While MFs originating  
519 from the same nucleus do not necessarily carry the same information, single cell label supports the idea  
520 that rosettes from the same fiber terminate densely (Quy, 2011; Sultan, 2001), and physiological data  
521 support the notion that GrCs can receive information from like fibers (Jörntell and Ekerot, 2006).  
522 Before including spatial clustering in our model, we measured the patchiness of two MF pathways,  
523 analyzing the distribution of MFRs. We labeled the nucleocortical and ponto-cerebellar pathways using  
524 AAVs expressing fluorescent proteins and analyzed MFRs in Crus 1 and Lobule 6, used as  
525 representative locations (See Methods). Nearest neighbor analyses from 874 rosettes revealed that most  
526 MFRs are clustered, existing within 100  $\mu\text{m}$  of another MFR from the same source (Fig. 5C).

527

528 We therefore explored the effect of these spatial characteristics on GrC combinatorial diversity in our  
529 model. We compared the GrC combinatorial diversity produced with unclustered versus clustered  
530 MFRs. To do this, we computed the number of unique GrC MFR combinations produced by the model  
531 as a function of MFR diversity relative to the number of theoretically possible combinations, based on  
532  $n$  choose  $k$  with replacement, where  $k = 4, 3,$  or  $2$  for quartet, triplet and doublet combinations  
533 respectively (Fig. 5D,E, color coded by combination size). In unclustered models, MFR ID numbers  
534 were drawn at random from a uniform probability distribution. In clustered models, MFR ID numbers  
535 were drawn at random from a Gaussian-like probability distribution function, leading to over and  
536 underrepresentation of specific ID numbers in the population. Clustering MFR ID numbers attenuated  
537 the fraction of theoretical diversity produced by the model compared to unclustered inputs (Fig. 5D-F)  
538 and enhanced the redundancy of MFR combinations (Fig. 5G).

539

540 The trade-off between diversity and redundancy observed with clustering raised related questions of  
541 whether other features of mossy fiber organization affect these parameters. In addition to clustered  
542 inputs (Fig. 5A, C) we noted that, although rare, MFRs can appear hundreds of microns away from  
543 rosettes from the same source (Fig. 5B-C). We therefore asked how these sparse, numerically limited,  
544 MFRs contribute to GrC combinatorial diversity. We analyzed diversity and redundancy of GrC  
545 combinations produced in model systems mimicking these anatomical features. We modeled three  
546 systems to facilitate comparisons. The ‘baseline’ system contained MFRs with ‘ $n$ ’ ID numbers  
547 uniformly distributed within the system; the ‘sparse’ system contained MFRs with ‘ $n$ ’ ID numbers but

548 additionally, a single MFR was assigned an ID number unique to the system; and the ‘expanded’  
549 condition, in which a new ID was uniformly added to the baseline system (‘n+1’ ID numbers).  
550 Compared to the baseline system, sparse rosettes decreased redundancy and increased the diversity of  
551 combinations, similar to the effect of adding an additional input (Fig. 5H). However, compared to the  
552 expanded system, the sparse input better preserved the redundancy of combinations that were present in  
553 the baseline system, suggesting that sparse fibers increases diversity with less detriment to redundancy  
554 compared to adding another input uniformly to the space (Fig. 5I, See Methods for details).

555

### 556 **Impact of mossy fiber filopodia on GrC combinatorial diversity**

557 Mossy fiber filopodia are long, thin, bouton-bearing processes that extend from MFRs (Fig. 6A-C).  
558 They have recently been shown to form synapses on GrCs (Gao et al., 2016), raising the question of  
559 their potential role in GrC combinatorial diversity. We reconstructed and analyzed pontine and  
560 nucleocortical MFRs from throughout the cerebellar cortex (Fig. 6B-D), quantifying the fraction of  
561 MFRs possessing filopodia (n = 1658 boutons), the number of boutons per filopodium (n = 84  
562 boutons), and the distance between these boutons and the MFR (n = 84 boutons). Filopodial boutons  
563 were typically within 22 microns of the rosette, and there were between 1-4 filopodial boutons per  
564 rosette (Fig. 6D; median, 2). We found that nearly 32.2% of nucleocortical MFRs possessed filopodia,  
565 while pontine MFRs possessed filopodia at a lower rate, 11.3%, such that the likelihood of bearing  
566 filopodia for the entire population we observed was 16.3%.

567

568 We used these measurements in our GCL model, adding 1-5 synapses to GrCs located within 22  $\mu$ m of  
569 a randomly selected 8-20% of MFRs, simulating filopodia. We analyzed the effect of these filopodia-  
570 like synapses on GrC combinatorial diversity and redundancy. In the model, filopodia-like extensions  
571 enhanced the diversity of GrC combination (Fig. 6E), increasing the number of unique combinations of  
572 4 MFR inputs beyond the number of granule cells present. This effect was a consequence of increasing  
573 the number of MFRs contacting many GrCs, which was previously limited to 4 (Fig. 6F). As the  
574 diversity of MFRs increased differences between systems with and without filopodia became more  
575 pronounced (Fig 6F). MFR filopodia also enhanced redundancy of quartets in low-to-modest diversity  
576 systems, expanding the representation of individual inputs, particularly of rarer MFRs (Fig. 6G).

577

578 These modeling results indicate that filopodia mainly enhanced combinatorial diversity when MFR  
579 diversity was high, i.e. in instances when individual MFR identities are sparser. We tested whether

580 sparseness of MFRs was related to the presence or absence of filopodia in our anatomical samples,  
581 measuring the nearest neighbors of filopodia-bearing and non-bearing MFRs. In keeping with  
582 predictions from the model, MFRs bearing filopodia were more sparsely spaced from like-neighbors.  
583 Median nearest neighbors for MFRs that did not bear rosettes was 23.1 microns, while those bearing  
584 filopodia were 30 microns apart. Differences in the distributions were highly significant (Fig. 6E; K-S  
585 goodness-of-fit test,  $p = 1.5 \times 10^{-21}$ ). Taken together, filopodia could serve an important role in the  
586 function of the GCL to enhance representation of sparse fibers, increasing combinatorial diversity and  
587 redundancy.

588

## 589 **Discussion**

590 Here we explored the effects of GCL morphological features on combination of afferents and  
591 diversification of GrCs. Our studies reveal a surprising theme of anatomical features favoring  
592 redundancy of afferent mixing rather than simply maximizing diversity. These findings raised the  
593 question of whether the spatial restrictions confer any advantage to information processing by the layer.  
594 We found that redundancy produced by spatially clustered afferents not surprisingly reduces  
595 dimensionality but enhances the capacity for temporal diversification of GrC activity. Empirical  
596 analysis of MFs validated features of the model, suggest potential evolutionary pressures structuring  
597 afferent mixing in the cerebellum.

598

599 Fundamental theoretical work on the GCL first proposed that GrCs combine afferents to support pattern  
600 separation and noise reduction by Purkinje neurons, under the guidance of climbing-fiber mediated  
601 teaching signals (Marr, 1969; Albus, 1971). Considerable empirical support for this view exists, and  
602 similar circuits are seen in diverse brain areas and species, suggesting common computational  
603 principles (Caron et al., 2014; Kennedy et al., 2014). We investigated how seemingly non-random  
604 features (i.e. patchiness) of cerebellar anatomy impact GrC combinatorial diversity. While it is perhaps  
605 obvious that every permutation of MFRs is not produced by the GCL, the specific limitations of this  
606 recoding scheme have, to our knowledge, not been described previously.

607

## 608 **Dendrite length and afferent diversity influence combinatorial load**

609 We found that the short dendrites strongly limit GrC access to the full diversity of inputs to a region.  
610 Regardless of the diversity of inputs, individual GrCs access fewer than 10 different inputs (Fig. 2).  
611 The consequences of this limitation are evident when comparing the number of different MFR

612 combinations produced by GrCs to the total number of GrCs: the diversification is submaximal, and the  
613 number of unique combinations of 4 inputs remains below the number of GrCs in the population. This  
614 indicates that as mossy fibers diversify within a region of cortex, GrCs share similar inputs, producing  
615 redundancy and reducing the dimensionality of information representation in the layer (Fig. 3; Litwin-  
616 Kumar et al., 2017).

617

### 618 **Benefits conferred by anatomical organization**

619 GrC redundancy is surprising given that the computational power of combinatorial diversity is  
620 degraded with correlated and overlapping inputs (Barak et al., 2013; Rigotti et al., 2013; Litwin-Kumar  
621 et al., 2017). We speculated that over-representation of particular combinations, produced both by GrC  
622 morphology (Fig. 2) and MFR clustering (Fig. 5), may facilitate temporal expansion of GrC coding, a  
623 property hypothesized to occur in the service of learned timing (Medina et al., 2000). If similar  
624 combinations of inputs carrying specific information engage many GrCs, then inhibitory feedback  
625 mechanisms could conceivably diversify the temporal representation more effectively than if that  
626 representation is overly sparse. We tested this assumption by developing a series of equations that  
627 weighted both diversification in identity and redundancy (Fig. 3), penalizing over-representation and  
628 under-representation of combinations. We found that the spatially-organized model outperformed the  
629 random connectivity model when output featured both high dimensional recombination of inputs and  
630 temporal expandability (Fig. 3C).

631

632 These findings are interesting in light of recent studies showing denser engagement of GrCs than  
633 predicted by statistical models of the GCL (Marr, 1969). In both mice and fish, between 20 and 80% of  
634 monitored GrCs could be active within a short epoch, far greater than 1% predicted (Giovanucci et al.,  
635 2017; Wagner et al., 2017; Knogler et al., 2017). Our data suggest that this difference need not preclude  
636 combinatorial diversity as a major feature of granule layer coding but predict that this redundant code is  
637 temporally diversified, but not yet visible with relatively slow  $\text{Ca}^{2+}$  indicators used in these studies.

638

### 639 **Anatomical Diversity of Mossy Fibers Afferents**

640 Although specific estimates of MF diversity are lacking, recent work employing bulk viral label of  
641 diverse precerebellar structures indicate extensive intermixing of two sources and convergence on  
642 individual GrCs (Huang et al., 2013), consistent with inferences from individual MF ramification  
643 patterns. Brainbow-labeled MFs in the cerebellar flocculus indicate highly heterogeneous fibers in a

644 small volume (Livet et al., 2007) while rosette spacing measured in individual fibers averaged  $66 \pm 55$   
645  $\mu\text{m}$  (Sultan, 2001). Individual fiber data therefore suggest that an average of 8 MFR duplications occur  
646 within  $100 \mu\text{m}^3$ , with an ID density of roughly 30, slightly higher than the location of peaks describing  
647 the marginal increase in GrC diversity produced by an addition MFR (between 10 and 20  
648 IDs/247MFRs).

649  
650 MF distributions from bulk labeled nuclei show much denser innervation patterns (Huang et al. 2013;  
651 Akintunde and Eisenaman, 1994; Brodal and Bjaalie, 1997; Quy et al., 2011; Shinoda et al., 1992;  
652 McCrea et al., 1977; Houck and Person, 2014; 2015). While these clusters represent ramification of  
653 different neurons, physiological data suggest that there is likely some overlap in information encoded  
654 from individual precerebellar nuclei (Jörntell and Ekerot, 2006). We explored the effect of MFR  
655 clustering on combinatorial diversity and found that redundancy is enhanced more than diversity is  
656 reduced (Fig. 5). This trade-off suggests that MF afferents may have evolved densities that exploit both  
657 combinatorial expansion by the layer and redundancy of local representation.

658  
659 The nucleocortical pathway has recently regained attention as an intriguing feedback pathway within  
660 the cerebellum (Tolbert et al., 1978; Houck and Person, 2014; 2015; Gao et al., 2016). This pathway  
661 produces a fairly well-circumscribed input to the cerebellar cortex which include sparse rosettes (Fig.  
662 5; Houck and Person, 2015; Gao et al., 2016). We found that sparse fibers increase GrC diversity, but at  
663 the cost of redundancy. However, sparse rosettes preserved more redundancy than simply adding a new  
664 MFR uniformly to the system (Fig. 5). This effect suggests that sparse inputs are able to moderately  
665 diversify systems without disrupting redundancy.

666  
667 Finally, we explored the contribution of MFR filopodia to combinatorial diversity. MFR filopodia have  
668 been noted for decades (Palay and Chan-Palay, 1974; Mason and Gregory, 1984; Kalinovsky et al.,  
669 2011) and are now appreciated to form synapses on both Golgi cells (Ruediger et al. 2011) and GrCs  
670 (Gao et al, 2016). In the model, we found that filopodia allow MFRs to support more combinatorial  
671 expansion without the spatial cost of producing a new rosette. In diverse MFR systems, where  
672 individual IDs are sparser, filopodia enhanced GrC combinatorial diversity, which was in keeping with  
673 the observation that sparser MFRs were more likely to bear filopodia. Conversely, filopodia enhanced  
674 redundancy, especially in triplet and doublet systems (Fig. 6G). Our reconstructions, moreover,  
675 highlight the morphological diversity of filopodia and suggest further experiments defining the relative

676 synaptic strength of these inputs relative to MFRs. While it is unlikely that all MFR filopodia contact  
677 GrCs, effects were graded proportional to the number of synapses added.

678

### 679 **Physiology of MFs and influences on combinatorial representation**

680 Physiological data on multimodal convergence is beginning to emerge, and the details of findings in  
681 these studies highlight potential nuances to the combinatorial hypothesis. While GrCs in both mammals  
682 and fish integrate diverse information (Sawtell, 2010; Ishikawa et al., 2015; Arenz et al., 2008) the  
683 question remains whether a complete quartet of MFs is typically required for GrCs to reach threshold,  
684 or whether subsets of inputs are sufficient to drive GrC activity (Ishikawa et al., 2015; Rancz et al.,  
685 2007; Jorntell and Ekerot, 2006; Rossert et al., 2014). Recent evidence of diversity of synaptic  
686 properties from different MF types could in part explain these diverse outcomes, with some afferents  
687 having powerful driver-like effects on GrCs while other afferents are weaker but facilitate with use  
688 (Chabrol et al., 2015). This physiological diversity suggests that the number of MFs required to drive a  
689 GrC might be regulated by the specific identities of the inputs that are active.

690

691 Additionally, MFRs show LTP with theta burst stimulation (D'Angelo et al., 1999; Hansel et al., 2001),  
692 raising the question of whether increasing synaptic strength allows sub-quartet MFR combinations to  
693 drive GrCs to threshold. We found that, with increasing MFR strength, GrCs with a fixed threshold can  
694 be driven with a greater diversity of combined inputs, allowing the GCL to represent information  
695 beyond the limit imposed on quartets by the GCL population. We showed that the spatial extent of  
696 GrCs that share 3 inputs is considerably larger than those that share 4 (Fig. 4), therefore, MF-LTP could  
697 contribute both to redundant representation of information and spatially broader representations.

698

### 699 **Golgi cells and temporal expansion**

700 With MFR patchiness, GrC morphology, MF physiology and MFR filopodia all enhancing GrC  
701 redundancy, the Golgi cell network becomes a critical player in regulating the size of the co-active  
702 MFR combination transmitted to Purkinje neurons, via parallel fibers activation of GoCs. Tonic  
703 inhibition via Golgi cell inhibition dynamically sets the threshold for GrCs (Brickley et al., 1996;  
704 Duguid et al., 2012; Duguid et al., 2015), and phasic inhibition produces surround inhibition and  
705 temporal sharpening (D'Angelo et al., 2013; Nieuwenhuis et al., 2014; Kanichay and Silver, 2008). Because  
706 even at relatively high MFR diversity neighboring GrCs are likely to share a subset of inputs (Fig. 4),  
707 GoC inhibition is in a position to dynamically regulate the number of shared inputs driving GrCs

708 (D'Angelo, 2008; Solinas et al., 2010).

709

## 710 **Conclusions**

711 This study explored how a variety of features of granule layer organization contribute to recombining  
712 MF inputs. GCL morphology limits mixing locally, but patchy ramification patterns contribute to  
713 robust representation, which may be important for temporal diversification or sufficient representation  
714 for motor learning. Along with our findings that diversity reaches a saturation point due to anatomical  
715 constraints, our study suggests that this failure to reach maximal diversity in GCL afferents is not  
716 inherently detrimental. Finally, specializations such as sparse inputs and filopodial extensions can  
717 mitigate limitations on combinatorial diversity created by anatomical restrictions. Future studies  
718 examining the complete connectome of patches of granule layer will indicate where within the space of  
719 maximal diversity vs redundancy the cerebellar system produces, and will further illuminate the  
720 computational strategies of the cerebellum.

**Acknowledgements:** Work was supported by NIH R01 NS084996-01, the Klingenstein Foundation, and the McKnight Foundation (ALP). Light microscopic experiments were performed in the University of Colorado Anschutz Medical Campus Advance Light Microscopy Core supported in part by Rocky Mountain Neurological Disorders Core Grant Number P30NS048154 and by NIH/NCRR Colorado CTSI Grant Number UL1 RR025780. We thank Dr. Brenda Houck for performing the tracer injections and histological preparation of mouse tissue for use in our modeling and analyses. We thank Drs. Joel Zylberberg and Gidon Felsen for providing helpful feedback on earlier drafts of the manuscript.

## 721 **Competing Interests**

722 The authors declare no competing interests.

## 723 **References**

724 Akintunde A, Eisenman LM (1994) External cuneocerebellar projection and Purkinje cell zebrin II  
725 bands: a direct comparison of parasagittal banding in the mouse cerebellum. *J Chem Neuroanat.* 7:75-  
726 86.

727

728 Albus JS (1971) A theory of cerebellar function. *Mathematical Biosci* 10: 25-61

729

730 Amaral DG, Dent JA (1981) Development of the mossy fibers of the dentate gyrus: I. A light and  
731 electron microscopic study of the mossy fibers and their expansions. *J Comp Neurol.* 195:51-86.

732

733 Apps R, Garwicz M (2005) Anatomical and physiological foundations of cerebellar information  
734 processing. *Nat Rev Neurosci.* 6:297-311. Review

735



- 736 Arenz A, Silver RA, Schaefer AT, Margrie TW (2008) The contribution of single synapses to sensory  
737 representation in vivo. *Science*. 321:977-80  
738
- 739 Barak O, Rigotti M, Fusi S (2013) The sparseness of mixed selectivity neurons controls the  
740 generalization-discrimination trade-off. *J Neurosci* 33:3844-3856  
741
- 742 Billings G, Piasini E, Lőrincz A, Nusser Z, Silver RA (2014) Network structure within the cerebellar  
743 input layer enables lossless sparse encoding. *Neuron*. 84:960-74.  
744
- 745 Blomfield S, Marr D. (1970) How the cerebellum may be used. *Nature*. 227:1224-8.  
746
- 747 Brickley SG, Cull-Candy SG, Farrant M. (1996) Development of a tonic form of synaptic inhibition in  
748 rat cerebellar granule cells resulting from persistent activation of GABAA receptors. *J Physiol*.  
749 497:753-9  
750
- 751 Brodal P, Bjaalie JG (1997) Salient anatomic features of the cortico-ponto-cerebellar pathway. *Prog*  
752 *Brain Res*.114:227-49. Review.  
753
- 754 Caron SJ, Ruta V, Abbott LF, Axel R (2013) Random convergence of olfactory inputs in the *Drosophila*  
755 mushroom body. *Nature*. 497:113-7  
756
- 757 Chabrol FP, Arenz A, Wiechert MT, Margrie TW, DiGregorio DA (2015) Synaptic diversity enables  
758 temporal coding of coincident multisensory inputs in single neurons. *Nat Neurosci*. 18:718-27  
759
- 760 Chadderton P, Margrie TW, Häusser M (2004) Integration of quanta in cerebellar granule cells during  
761 sensory processing. *Nature*.428:856-6  
762
- 763 Cheron G, Escudero M, Godaux E (1996) Discharge properties of brain stem neurons projecting to the  
764 flocculus in the alert cat. I. Medical vestibular nucleus. *J Neurophysiol* 76:1759–1774  
765
- 766 D’Angelo E (2008) The critical role of Golgi cells in regulating spatio-temporal integration and  
767 plasticity at the cerebellum input stage. *Front Neurosci*. 2:35-46  
768
- 769 D’Angelo E, Solinas S, Mapelli J, Gandolfi D, Mapelli L, Prestori F (2013) The cerebellar Golgi cell  
770 and spatiotemporal organization of granular layer activity. *Front Neural Circuits*. 7:93  
771
- 772 D’Angelo E (2017) Challenging Marr’s theory of the cerebellum. In: *Computational Theories and their*  
773 *Implementation in the Brain. The legacy of David Marr* (Vaina LM, Passingham RE, eds.) pp 62-78.  
774 Oxford: Oxford UP  
775
- 776 D’Angelo E, Rossi P, Armano S, Taglietti V (1999) Evidence for NMDA and mGlu receptor-dependent  
777 long-term potentiation of mossy fiber-granule cell transmission in rat cerebellum. *J Neurophysiol*.  
778 81:277-87  
779
- 780 Diwakar S, Lombardo P, Solinas S, Naldi G, D’Angelo E (2011) Local field potential modeling  
781 predicts dense activation in cerebellar granule cells clusters under LTP and LTD control. *PLoS One*.  
782 6(7):e21928  
783

- 784 Duguid I, Branco T, London M, Chadderton P, Häusser M (2012) Tonic inhibition enhances fidelity of  
785 sensory information transmission in the cerebellar cortex. *J Neurosci.* 32:11132-43.  
786
- 787 Duguid I, Branco T, Chadderton P, Arlt C, Powell K, Häusser M. (2015) Control of cerebellar granule  
788 cell output by sensory-evoked Golgi cell inhibition. *Proc Natl Acad Sci U S A.* 112:13099-104  
789
- 790 Eccles JC, Ito M, Szentagothai J (1967) *The cerebellum as a neuronal machine.* New York: Springer-  
791 Verlag  
792
- 793 Freeman JH, Rabinak CA. (2004) Eyeblink Conditioning in Rats Using Pontine Stimulation as a  
794 Conditioned Stimulus. *Integr Physiol Behav Sci.* 39(3): 180–191.  
795
- 796 Gao Z, Proietti-Onori M, Lin Z, Ten Brinke MM, Boele HJ, Potters JW, Ruigrok TJ, Hoebeek FE, De  
797 Zeeuw CI. (2016) Excitatory Cerebellar Nucleocortical Circuit Provides Internal Amplification during  
798 Associative Conditioning. *Neuron.* 89:645-57  
799
- 800 Garwicz M, Jorntell H, Ekerot CF (1998) Cutaneous receptive fields and topography of mossy fibres  
801 and climbing fibres projecting to cat cerebellar C3 zone. *J Physiol* 512:277–293  
802
- 803 Gebre SA, Reeber SL, Sillitoe RV. (2012) Parasagittal compartmentation of cerebellar mossy fibers as  
804 revealed by the patterned expression of vesicular glutamate transporters VGLUT1 and VGLUT2. *Brain*  
805 *Struct Funct.* 217:165-80.  
806
- 807 Giovannuci A, Badura A, Deverett B, Najafi F, Pereira TD, Gao Z, Ozden I, Kloth AD, Pnevmatikakis  
808 E, Paninski L, De Zeeuw CI, Medina JA, Wang SS. (2017) Cerebellar granule cells acquire a  
809 widespread predictive feedback signal during motor learning. *Nature Neuroscience* 20:727–734  
810
- 811 Halverson HE, Hubbard EM, Freeman JH. (2009) Stimulation of the lateral geniculate, superior  
812 colliculus, or visual cortex is sufficient for eyeblink conditioning in rats. *Learn Mem.* 16(5): 300–307.  
813
- 814 Hansel C, Linden DJ, D' Angelo E. (2001) Beyond parallel fiber LTD: the diversity of synaptic and  
815 non-synaptic plasticity in the cerebellum. *Nat Neurosci.* 4:467-75. Review  
816
- 817 Herculano-Houzel S. (2010) Coordinated scaling of cortical and cerebellar numbers of neurons.  
818 *Front Neuroanat.* 4:12.  
819
- 820 Houck BD, Person AL. (2014) Cerebellar loops: a review of the nucleocortical pathway. *Cerebellum.*  
821 13:378-85  
822
- 823 Houck BD, Person AL. (2015) Cerebellar Premotor Output Neurons Collateralize to Innervate the  
824 Cerebellar Cortex. *J Comp Neurol.* 523:2254-71  
825
- 826 Huang CC, Sugino K, Shima Y, Guo C, Bai S, Mensh BD, Nelson SB, Hantman AW (2013)  
827 Convergence of pontine and proprioceptive streams onto multimodal cerebellar granule cells. *Elife;*  
828 2:e00400.  
829
- 830 Ishikawa T, Shimuta M, Häusser M. (2015) Multimodal sensory integration in single cerebellar granule  
831 cells in vivo. *Elife.* Dec 29;4. pii: e12916

- 832  
833 Jörntell H, Bengtsson F, Geborek P, Spanne A, Terekhov AV, Hayward V. (2014) Segregation of tactile  
834 input features in neurons of the cuneate nucleus. *Neuron*. 83:1444-52.  
835  
836 Jörntell H, Ekerot CF. (2006) Properties of somatosensory synaptic integration in cerebellar granule  
837 cells in vivo. *J Neurosci*. 26:11786-9  
838  
839 Kalinovskiy A, Boukhtouche F, Blazeski R, Bornmann C, Suzuki N, Mason CA, Scheiffele P. (2011)  
840 Development of axon-target specificity of ponto-cerebellar afferents. *PLoS Biol* 9(2): e1001013.  
841  
842 Kanichay RT, Silver RA (2008) Synaptic and cellular properties of the feedforward inhibitory circuit  
843 within the input layer of the cerebellar cortex. *J Neurosci*. 28(36):8955-6  
844  
845 Kennedy A, Wayne G, Kaifosh P, Alviña K, Abbott LF, Sawtell NB. (2014) A temporal basis for  
846 predicting the sensory consequences of motor commands in an electric fish. *Nat Neurosci*. 17:416-22.  
847  
848 Knogler LD, Markov DA, Dragomir EI, Sith V, Portugues R. (2017) Sensorimotor Representations in  
849 Cerebellar Granule Cells in Larval Zebrafish Are Dense, Spatially Organized, and Non-temporally  
850 Patterned. *Curr. Biol.*, 27(9):1288-1302  
851  
852 Kolkman KE, McElvain LE, du Lac S. (2011) Diverse precerebellar neurons share similar intrinsic  
853 excitability. *J Neurosci*. Nov 16;31(46):16665-74  
854  
855 Litwin-Kumar A, Harris KD, Axel R, Sompolinsky H, Abbott LF (2017) Optimal degrees of synaptic  
856 connectivity. *Neuron* 93, 1-12  
857  
858 Li WK, Hausknecht MJ, Stone P, Mauk MD (2013) Using a million cell simulation of the cerebellum:  
859 network scaling and task generality. *Neural Netw*. 47:95-102  
860  
861 Livet J, Weissman TA, Kang H, Draft RW, Lu J, Bennis RA, Sanes JR, Lichtman JW. (2007)  
862 Transgenic strategies for combinatorial expression of fluorescent proteins in the nervous system.  
863 *Nature*. 450:56-62  
864  
865 Mackie PD, Morley JW, Rowe MJ (1999) Signalling of static and dynamic features of muscle spindle  
866 input by external cuneate neurones in the cat. *J Physiol* 519:559–569.  
867  
868 Mapelli J, D'Angelo E. (2007) The spatial organization of long-term synaptic plasticity at the input  
869 stage of cerebellum. *J Neurosci*. 27:1285-96  
870  
871 Mason CA, Gregory E. (1984) Postnatal maturation of cerebellar mossy and climbing fibers: transient  
872 expression of dual features on single axons. *J Neurosci*. 4:1715-35.  
873  
874 Mauk MD, Donegan NH. (1997) A model of Pavlovian eyelid conditioning based on the synaptic  
875 organization of the cerebellum. *Learn Mem*. 4:130-58.  
876  
877 Marr D. (1969) A theory of cerebellar cortex. *J Physiol*. 202:437-70.  
878  
879 McCrea RA, Bishop GA, Kitai ST. (1977) Electrophysiological and horseradish peroxidase studies of

- 880 precerebellar afferents to the nucleus interpositus anterior. II. Mossy fiber system. *Brain Res.* 122:215-  
881 28.  
882
- 883 Medina JF, Garcia KS, Nores WL, Taylor NM, Mauk MD (2000) Timing mechanisms in the  
884 cerebellum: testing predictions of a large-scale computer simulation. *J Neurosci.* 20:5516-25  
885
- 886 Nieuwenhuis TR, Mapelli L, D'Angelo E. (2014) Regulation of output spike patterns by phasic inhibition in  
887 cerebellar granule cells. *Front Cell Neurosci.* 8:246  
888
- 889 Palay S and Chan-Palay V (1974) *Cerebellar Cortex Cytology and Organization*. New York: Springer-  
890 Verlag  
891
- 892 Palkovits M, Magyar P, Szentágothai J (1971) Quantitative histological analysis of the cerebellar cortex  
893 in the cat. II. Cell numbers and densities in the granular layer. *Brain Res.* 32:15-30  
894
- 895 Quy PN, Fujita H, Sakamoto Y, Na J, Sugihara I. (2011) Projection patterns of single mossy fiber axons  
896 originating from the dorsal column nuclei mapped on the aldolase C compartments in the rat cerebellar  
897 cortex. *J Comp Neurol.* 519:874-99  
898
- 899 Rancz EA, Ishikawa T, Duguid I, Chadderton P, Mahon S, Häusser M. (2007) High-fidelity  
900 transmission of sensory information by single cerebellar mossy fibre boutons. *Nature.* 450:1245-8  
901
- 902 Rigotti M, Barak O, Warden MR, Wang XJ, Daw ND, Miller EK, Fusi S. (2013) The importance of  
903 mixed selectivity in complex cognitive tasks. *Nature.* 497:585-9  
904
- 905 Ruediger S, Vittori C, Bednarek E, Genoud C, Strata P, Sacchetti B, Caroni P. (2011) Learning-related  
906 feedforward inhibitory connectivity growth required for memory precision. *Nature.* 473:514-8  
907
- 908 Sawtell NB. (2010) Multimodal integration in granule cells as a basis for associative plasticity and  
909 sensory prediction in a cerebellum-like circuit. *Neuron.* 66: 573-84  
910
- 911 Schneiderman N, Gormezano I (1964) Conditioning of the nictitating membrane of the rabbit as a  
912 function of CS–US interval. *J Comp Physiol Psychol* 57: 188–195  
913
- 914 Schmitz C, Hof PR (2005) Design-based stereology in neuroscience. *Neuroscience* 130, 813-831  
915
- 916 Shinoda Y, Sugiuchi Y, Futami T, Izawa R. 1992 Axon collaterals of mossy fibers from the pontine  
917 nucleus in the cerebellar dentate nucleus. *J Neurophysiol.* 67:547-60.  
918
- 919 Sillitoe RV, Vogel MW, Joyner AL. (2010) Engrailed Homeobox Genes Regulate Establishment of the  
920 Cerebellar Afferent Circuit Map *J Neurosci* 30:10015-10024  
921
- 922 Smith MC, Coleman SR, Gormezano I. (1969) Classical conditioning of the rabbit's nictitating  
923 membrane response at backward, simultaneous, and forward CS–US intervals. *J Comp Physiol Psychol*  
924 69: 226–231  
925
- 926 Solinas S, Nieuwenhuis T, D'Angelo E. (2010) A realistic large-scale model of the cerebellum granular layer  
927 predicts circuit spatio-temporal filtering properties. *Front Cell Neurosci.* 4:12

928

929 Spanne A, Jörntell H. (2015) Questioning the role of sparse coding in the brain. *Trends Neurosci.* 2015  
930 38:417-27.

931

932 Spanne A, Jörntell H. (2013) Processing of multi-dimensional sensorimotor information in the spinal  
933 and cerebellar neuronal circuitry: a new hypothesis. *PLoS Comput Biol.*;9(3):e1002979.

934

935 Steinmetz JE, Rosen DJ, Chapman PF, Lavond DG, Thompson RF (1986) Classical conditioning of the  
936 rabbit eyelid response with a mossy-fiber stimulation CS: I. Pontine nuclei and middle cerebellar  
937 peduncle stimulation. *Behav Neurosci.* 100:878-87

938

939 Sultan F. (2001) Distribution of mossy fibre rosettes in the cerebellum of cat and mice: evidence for a  
940 parasagittal organization at the single fibre level. *Eur J Neurosci.* Jun;13(11):2123-30

941

942 Tolbert DL, Bantli H, Bloedel JR. (1978) Organizational features of the cat and monkey cerebellar  
943 nucleocortical projection. *J Comp Neurol.* 182:39-56

944

945 Valera AM, Binda F, Pawlowski SA, Dupont JL, Casella JF, Rothstein JD, Poulain B, Isope P. (2016)  
946 Stereotyped spatial patterns of functional synaptic connectivity in the cerebellar cortex. *Elife.* Mar 16;5

947

948 Voogd J, Glickstein M (1998) The anatomy of the cerebellum. *TINS* 21, 370-375

949

950 Wagner MJ, Kim TH, Savall J, Schnitzer MJ, Luo L. (2017) Cerebellar granule cells encode the  
951 expectation of reward. *Nature.* 544:96-100

952

953 Welker W, Sanderson KJ, Shambes GM. (1984) Patterns of afferent projections to transitional zones in  
954 the somatic sensorimotor cerebral cortex of albino rats. *Brain Res.* 292:261-7

955

956 Wu HS, Sugihara I, Shinoda Y. (1999) Projection patterns of single mossy fibers originating from the  
957 lateral reticular nucleus in the rat cerebellar cortex and nuclei. *J Comp Neurol.* 411:97-118

958

## 959 **Figure Legends**

960

### 960 **Figure 1**

961 Theoretical limitations of granule cell input combinations based on mossy fiber rosette (MFR)-to-  
962 granule cell (GrC) ratios. **A.** Schematic diagram illustrating the MFR-GrC-Purkinje circuit and  
963 terminology. MFRs with identities (IDs) w, x, y, z, converge onto a specific GrC. This combination of  
964 MFRs to this GrC represents the “quartet” for the illustrated GrC. Throughout the study, we examined  
965 how the diversity of MFR combinations onto GrCs relates to patterns of MFR inputs. **B.** The number of  
966 theoretical permutations of MFRs is given by the binomial coefficient, defined by  $n$  choose  $k$  with  
967 replacement, where  $n$  is the number of MFRs and  $k$  is the number of inputs combined per GrC. The  
968 binomial coefficient, for  $n$  choose 4 with replacement (black), is overlaid with the linear function (red)  
969 showing the ratio of GrCs to MFRs. The intersections of the curves indicate that based on the linear  
970 relationship of MFRs to GrCs, GrCs could fully permute a maximum of 5 unique MFRs. **C.** Similar to

971 (B), but with the linear function relating GrCs to mossy fibers (MFs), taking into account multiple  
972 MFRs per MF axon. **D.** The binomial coefficient (black trace; n choose 4 with replacement) is plotted  
973 against the number of unique MF IDs that could theoretically be permuted (equivalent to n). The cat  
974 cerebellum contains an estimated 2-4 billion GrCs (red lines), indicating that the cat GCL could fully  
975 permute 470 to 560 different MFRs. To distribute those MFR identities over the 77 million MFRs  
976 estimated to occupy the cat cerebellum, these unique sources would have to be duplicated between  
977 2735-4595 times. Abbreviations: GCL, granule cell layer; MF, mossy fiber; GrC, granule cell; PKJ,  
978 Purkinje; MFR, mossy fiber rosette.

979

## 980 **Figure 2**

981 The spatial organization of the granule cell layer (GCL) restricts combinatorial expansion. **A.** We  
982 constructed spatially realistic models of the granule cell layer (GCL), shown here in a simplified  
983 rendering. Large spheres represent simulated MFRs, with colors representing ID numbers. Grey  
984 spheres represent GrCs, and GrC dendrites are grey lines. A 247 MFR system is depicted here, with all  
985 synaptically connected GrCs per MFR rendered. Scale bar is approx. 25  $\mu\text{m}$ . **B.** Cartoons illustrating  
986 low and high diversity systems. Bottom rows illustrate MFRs with ID indicated by color. GrCs  
987 (middle), combine local MFR inputs to assume a unique combinatorial identity (blended colors).  
988 Throughout the remainder of the study, we examine how MFR diversification and clustering in a spatial  
989 model of the GCL influences GrC combinatorial diversity, testing, for example, how spatial segregation  
990 of inputs favors particular combinations (e.g. the purple GrC, indicating a theoretical combination of  
991 red and blue MFRs cannot exist, because red and blue MFRs are too far apart). **C.** Effect of GrC  
992 dendrite length on access to unique mossy fiber rosettes (mean  $\pm$  SEM; n = 10 systems with 10 trials  
993 each, for each MFR diversity level). An anatomically realistic dendritic range between 12-20  $\mu\text{m}$   
994 restricts access to roughly 6 unique inputs, regardless of the diversity of the system. **D.** Populations of  
995 combinatorially unique GrCs as defined by their k-input combinations (quartets, triplets, etc.) as a  
996 function of increasing numbers of unique MFR identities uniformly distributed across the population.  
997 Dashed line indicates the total number of GrCs in the system. **E.** A function plotting the relative  
998 contribution of each additional MFR ID to the total number of MFR combinations made by GrCs (Eq.  
999 1). As the model diversifies with increasing numbers of unique MFRs, fewer new combinations are  
1000 produced per additional MFR ID number, peaking at 5-20% diversity (i.e. between 5 and 20 MFRs/100  
1001 share the same ID) for quartet and triplet systems. This peak indicates the point beyond which  
1002 increasing diversity contributes relatively less to the number of unique MFR combinations made by

1003 GrCs. **F.** The effect of MF long term potentiation on combinatorial representation. With a GrC firing  
1004 threshold of 4 active inputs, a full quartet of active MFRs is required to drive activity. As the strengths  
1005 of inputs increase, the mean number of potential combinations that can drive a given GrC increase.

1006

### 1007 **Figure 3**

1008 Spatial patterning enhances temporal expansion of GrC representation. **A.** Cartoon illustrating the  
1009 hypothesized tradeoff between combinatorial expansion (CE) and temporal expandability (TE), which  
1010 requires redundant MFR combinations (shared colors) by multiple GrCs. **B.** Combinatorial expansion  
1011 dimensionality plotted as a function of MFR diversity for the spatially-constrained model  
1012 “physiological” and non-spatial model. **C.** The composite of combinatorial expansion and temporal  
1013 expansion (TECE) for physiologically constrained (red) and non-spatial (black models) for a time  
1014 window of 500 ms. At higher MFR diversity levels, the spatially realistic model possesses greater  
1015 TECE dimensionality than the non-spatial model because it both expands combinations and produces  
1016 redundancy required for temporal expansion of dimensions.

1017

### 1018 **Figure 4**

1019 Spatial clustering of GrCs with similar combinations emerges as a consequence of MFR access and  
1020 diversity. **A.** Cumulative distributions plotting the distance between a GrC and every other GrC in the  
1021 model that shares a given number of its MFR inputs (i.e. GrCs that share quartets, GrCs that share  
1022 triplets etc.) in a system with 5 different mossy fibers (5 ID) **B.** Same as (A) but in a system with 20  
1023 different mossy fibers (20 ID). Colors as in A. **C.** Summary of clustering effect as a function of MFR  
1024 diversity, illustrating that dense spatial restriction of like-combinations is most pronounced with high  
1025 MFR diversity. Colors as in A. **D.** Illustration of spatial extent of GrCs sharing 4 inputs “quartets”  
1026 (red), triplets (green) and doublets (blue). **E.** Summary of volumes occupied by like-quartets, triplets  
1027 and doublets as a function of the diversity of MF IDs in the system.

1028

### 1029 **Figure 5**

1030 Clustered mossy fibers enhance redundancy at the expense of diversity. **A.** Representative example of  
1031 patches of nucleocortical (green) and pontine (magenta) mossy fiber rosettes in mouse Lobule 7 (n = 4  
1032 mice, 8 injections). Scale bar = 200  $\mu$ m. **B.** Representative example of both clustered (pontine,  
1033 magenta) and sparse (nucleocortical, green) MFRs at the apex of Crus 1. **C.** Histogram of the mean  
1034 distance of MFRs to their 4 closest neighbors labeled from the same injection, (n = 874 rosettes, 4

1035 mice). **D.** Percentage of the total theoretical combinations ( $n$  choose  $k$  with replacement) produced by  
1036 the modeled system, as a function of the number of different MFRs in the system. Rosettes were  
1037 positioned following a uniform probability distribution, i.e no explicit rosette clustering. **E.** Percentage  
1038 of maximal GrC combinatorial diversity produced as a function of MFR diversity when MFR IDs were  
1039 non-uniformly represented. **F.** The difference in the diversity of MFR combinations produced with  
1040 clustered vs unclustered inputs, computed by subtracting curves in Figure 5E-5D. Unclustered mossy  
1041 fiber distributions support more combinatorial diversity compared to clustered mossy fiber  
1042 distributions. **G.** Percent change in the redundancy of represented combinations in clustered systems vs  
1043 uniform systems as a function of the number of unique MFRs in the system. At modest MFR diversity  
1044 (~20 IDs), clustering nearly doubles redundancy of combinations relative to unclustered fibers. **H.** The  
1045 effect of sparseness on redundancy and diversity compared to a system with  $n+1$  uniformly distributed  
1046 MFRs, plotted as a function of MFR diversity. A sparse rosette enhances redundancy but decrements  
1047 diversity. **I.** Mean sparse retention index plotted as a function of MFR diversity. Sparse inputs retain  
1048 more of the existing combinations that adding a uniform input.

1049

## 1050 **Figure 6**

1051 Mossy fiber filopodia enhance both combinatorial diversity and redundancy produced by GCL. **A.** A  
1052 representative image of an MFR bearing filopodia. **B.** A reconstruction of MFR in **A** that illustrates the  
1053 MFR in green and putative filopodial boutons in red. **C.** Reconstructions of 70 MFRs from 9 mice that  
1054 bore filopodia, illustrating morphological diversity. **D.** Box plots of median and inter-quartile ranges of  
1055 distances of filopodial boutons to the MFR and the number of boutons/MFR for pontine fibers,  
1056 nucleocortical fibers and both sources ( $n = 84$  MFRs, 9 mice). **E.** Cumulative distribution plot of  
1057 nearest neighbors between filopodia bearing and non-filopodia bearing MFR, showing that filopodia-  
1058 bearing rosettes are more sparsely positioned ( $n = 874$  boutons, 4 mice, 8 injections). **F.** Total number  
1059 of unique combinations of inputs plotted as a function of MFR diversity when 20% MFRs bore  
1060 between 1-5 filopodial boutons, contacting GrCs within 22 microns in the spatially constrained model.  
1061 Filopodia enhance the total number of all sizes of combinations, such that the total unique quartets  
1062 outnumber GrCs. **G.** Percent increase in MFR combination redundancy seen when filopodia are added  
1063 to 20% of MFRs (See methods).

1064

## 1065 **Table 1: Anatomical Data Used in Simulations**

| Value | Used in Simulation | Reference |
|-------|--------------------|-----------|
|-------|--------------------|-----------|



---

|                            |                                     |                                     |                                                |
|----------------------------|-------------------------------------|-------------------------------------|------------------------------------------------|
| <b>GrC density</b>         | $2.6 \times 10^6 / 1 \text{ mm}^3$  | $2.6 \times 10^6 / 1 \text{ mm}^3$  | Palkovitz et al., 1971                         |
| <b>GrC synapses/MFR</b>    | 52-112                              | $\mu=56-77$ , 10 systems            | Palkovitz et al., 1971; Jakob and Hámori, 1988 |
| <b>MFRs/GrC</b>            | 4                                   | 4                                   | Palkovitz et al., 1972                         |
| <b>GrC radius</b>          | 3 $\mu\text{m}$                     | 3 $\mu\text{m}$                     | Palay and Chan-Palay, 1974                     |
| <b>GrC dendrite length</b> | $\mu=14 \mu\text{m}$                | 20 $\mu\text{m}$ maximum            | Palkovitz, 1972                                |
| <b>MFR radius</b>          | $5.5 \pm 1.8$                       | 5 $\mu\text{m}$                     | Sultan, 2001                                   |
| <b>MFR density</b>         | $9.88 \times 10^4 / 1 \text{ mm}^3$ | $9.88 \times 10^4 / 1 \text{ mm}^3$ | Palkovitz, 1972                                |
| <b>Glomerular spacing</b>  | 18.4 $\mu\text{m}$                  | $18.4 \pm 2$                        | Palkovitz, 1972                                |
| <b>GCL thickness</b>       | 254 $\mu\text{m}$                   | 250 $\mu\text{m}$                   | Palkovitz, 1971                                |

---

1066 *Abbrv:GrC, granule cell; MFR, mossy fiber rosette; GCL, granule cell layer*

1067 **Table 1.** Values used in simulation and references cited for each.

1068

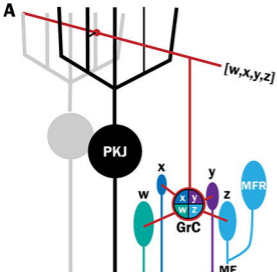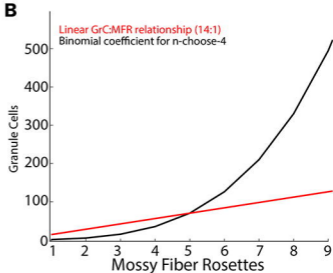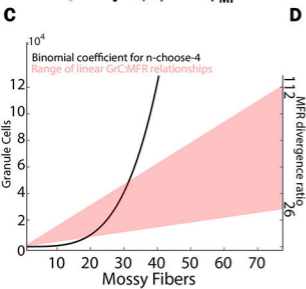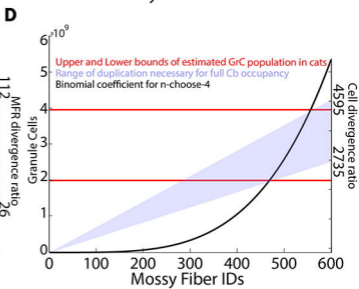

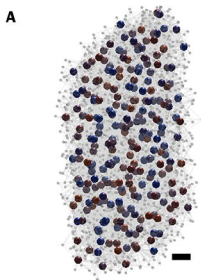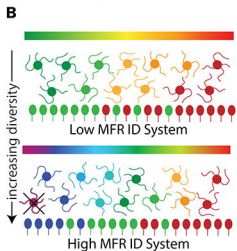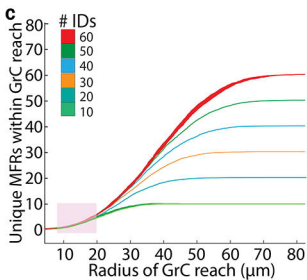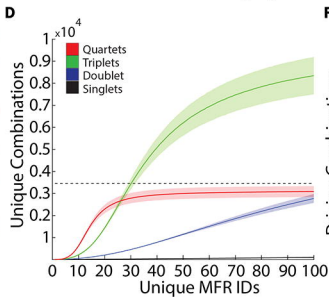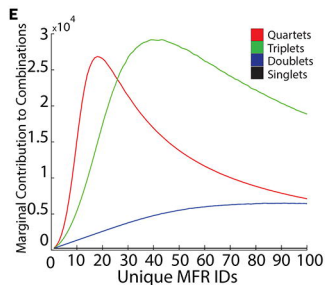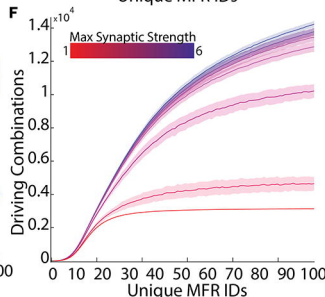

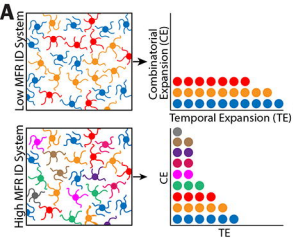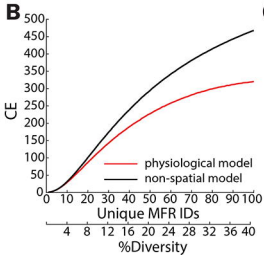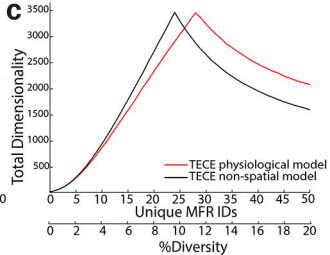

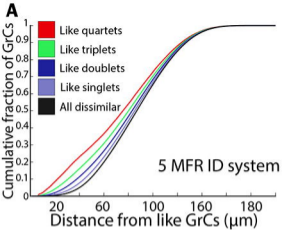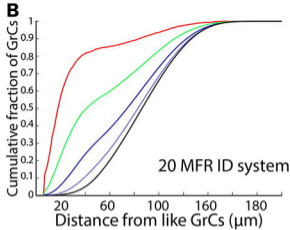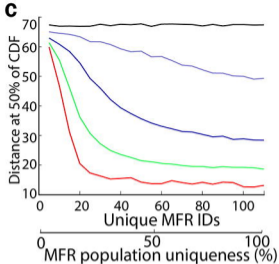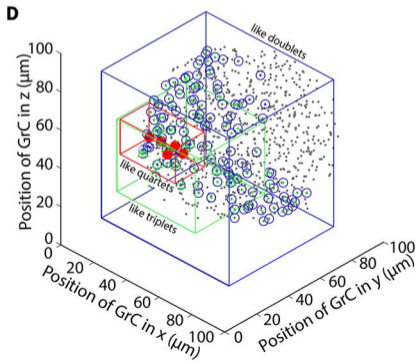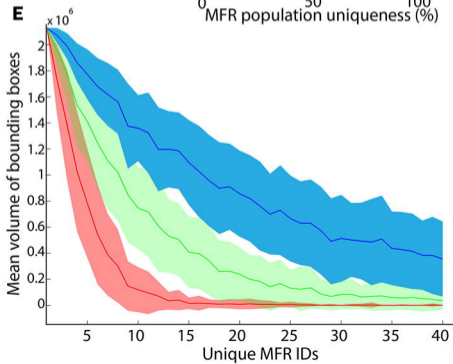

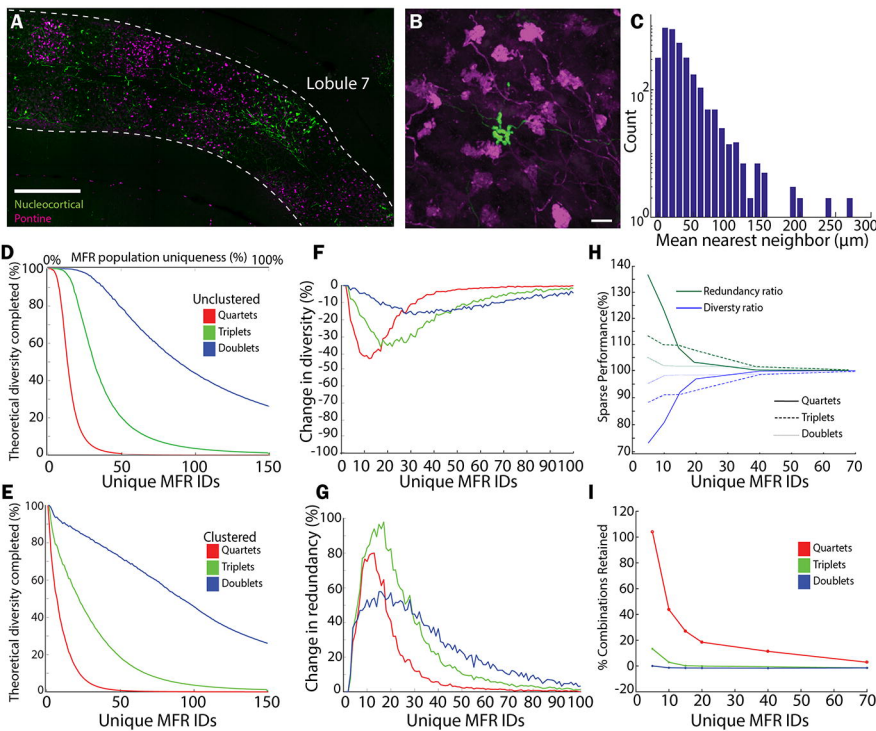

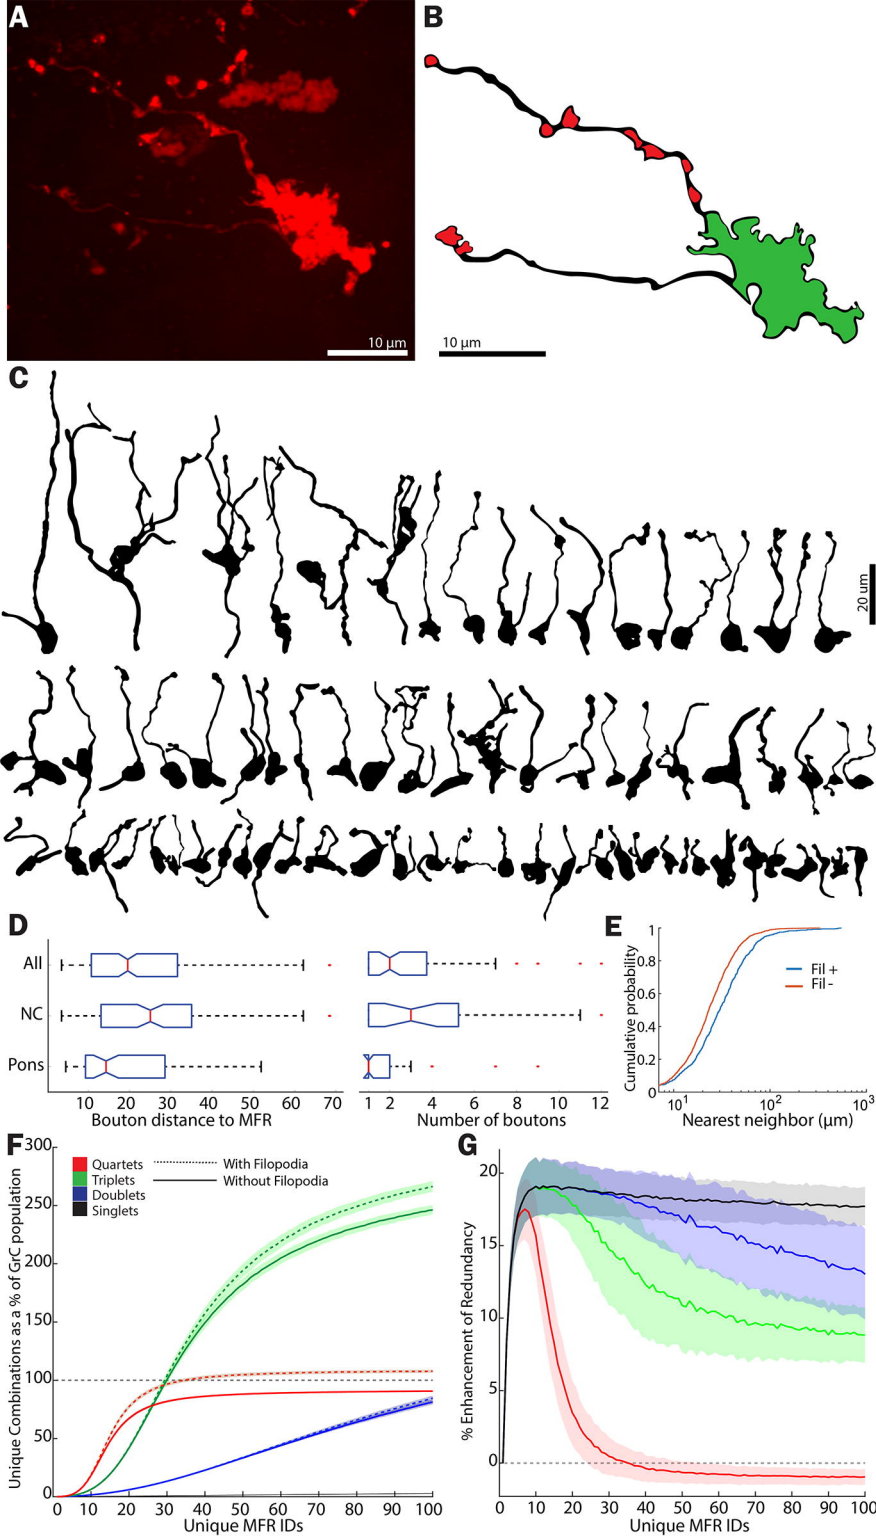

Source: https://www.biorxiv.org/content/10.1101/212324v1.full.pdf
